# Supplementary material for: An investigation of the effects of the common cold on simulated driving performance and detection of collisions: a laboratory study
Source: HighWire-hosted journal article supplement (doi:10.1136/bmjopen-2012-001047), 2012-01-01
Supplement: bmjopen-2012-001047-s1.pdf [file bmjopen-2012-001047-s1.pdf]

STROBE Statement—checklist of items that should be included in reports of observational studies

|                              | Item No |                                                                                                     |
|------------------------------|---------|-----------------------------------------------------------------------------------------------------|
| Title and abstract           | 1       | (a) Simulated driving and collision detection are given in both.                                    |
|                              |         | (b) A balanced summary of what was done and what was found is given in the abstract                 |
| <b>Introduction</b>          |         |                                                                                                     |
| Background/rationale         | 2       | The scientific background and rationale for the investigation being reported is given.              |
| Objectives                   | 3       | Specific objectives given.                                                                          |
| <b>Methods</b>               |         |                                                                                                     |
| Study design                 | 4       | The key elements of study design are given early in the paper                                       |
| Setting                      | 5       | The setting, locations, and logistics of data collection                                            |
| Participants                 | 6       | Recruitment of the participants and inclusion/exclusion criteria for the two groups are given       |
|                              |         |                                                                                                     |
| Variables                    | 7       | Outcome measures from the two tasks are described.                                                  |
| Data sources/<br>measurement | 8*      | For each variable of interest, sources of the data and details of methods of measurement are given. |

|                        |    |                                                                                                                     |
|------------------------|----|---------------------------------------------------------------------------------------------------------------------|
| Bias                   | 9  | Individual differences were adjusted for using healthy scores as covariates.                                        |
| Study size             | 10 | A sample size calculation based on prior research was carried out.                                                  |
| Quantitative variables | 11 | Analyses of covariance were carried out on the continuous variables, chisquare analyses on the categorical.         |
| Statistical methods    | 12 | (a) Described.                                                                                                      |
|                        |    | (b) N.A.                                                                                                            |
|                        |    | (c) N.A.                                                                                                            |
|                        |    | Use of data from a second visit, when all participants were healthy, was used to adjust for individual differences. |
|                        |    | (e) Describe any sensitivity analyses – N.A.                                                                        |

Continued on next page

| <b>Results</b>   |     |                                                                         |
|------------------|-----|-------------------------------------------------------------------------|
| Participants     | 13* | (a) Reported.                                                           |
|                  |     | (b) N.A.                                                                |
|                  |     | (c) N.A.                                                                |
| Descriptive data | 14* | Characteristics of study participants (eg demographic, clinical) given. |
|                  |     | (b) N.A.                                                                |
|                  |     | (c) <i>Follow up time given.</i>                                        |

|                          |     |                                                                               |
|--------------------------|-----|-------------------------------------------------------------------------------|
| Outcome data             | 15* | All outcomes reported.                                                        |
|                          |     |                                                                               |
|                          |     |                                                                               |
| Main results             | 16  | Significant effects shown in table.                                           |
|                          |     |                                                                               |
|                          |     |                                                                               |
| Other analyses           | 17  | Report other analyses done— N.A.                                              |
| <b>Discussion</b>        |     |                                                                               |
| Key results              | 18  | Key results summarised.                                                       |
| Limitations              | 19  | The limitations of the study and the need for further research are discussed. |
| Interpretation           | 20  | A cautious overall interpretation of results is given.                        |
| Generalisability         | 21  | The generalisability (external validity) of the study results is discussed.   |
| <b>Other information</b> |     |                                                                               |
| Funding                  | 22  | Source of funding and the role of the funders for the present study given.    |

\*Give information separately for cases and controls in case-control studies and, if applicable, for exposed and unexposed groups in cohort and cross-sectional studies.

**Note:** An Explanation and Elaboration article discusses each checklist item and gives methodological background and published examples of transparent reporting. The STROBE checklist is best used in conjunction with this article (freely available on the Web sites of PLoS Medicine at <http://www.plosmedicine.org/>, Annals of Internal Medicine at <http://www.annals.org/>, and Epidemiology at <http://www.epidem.com/>). Information on the STROBE Initiative is available at [www.strobe-statement.org](http://www.strobe-statement.org).
